# Supplementary material for: High-fat diet fuels prostate cancer progression by rewiring the metabolome and amplifying the MYC program
Source: PubMed Central journal article supplement (PMC6761092; doi:10.1038/s41467-019-12298-z), 2019-09-25
Supplement: 41467_2019_12298_MOESM1_ESM.pdf [file 41467_2019_12298_MOESM1_ESM.pdf]

**Supplementary Information**

**High-fat diet fuels prostate cancer progression by rewiring the metabolome  
and amplifying the MYC program**

Labbé *et al.*

## **Supplementary Figures**

**Supplementary Figure 1:** High-fat diet and MYC over expression alters the prostatic metabolome

**Supplementary Figure 2:** High-fat diet and MYC over expression alters the global prostatic chromatin profile and transcriptome

**Supplementary Figure 3:** The MYC transcriptional signature is amplified by high-fat diet

**Supplementary Figure 4:** The saturated fat-induced MYC signature does not correlate with BMI

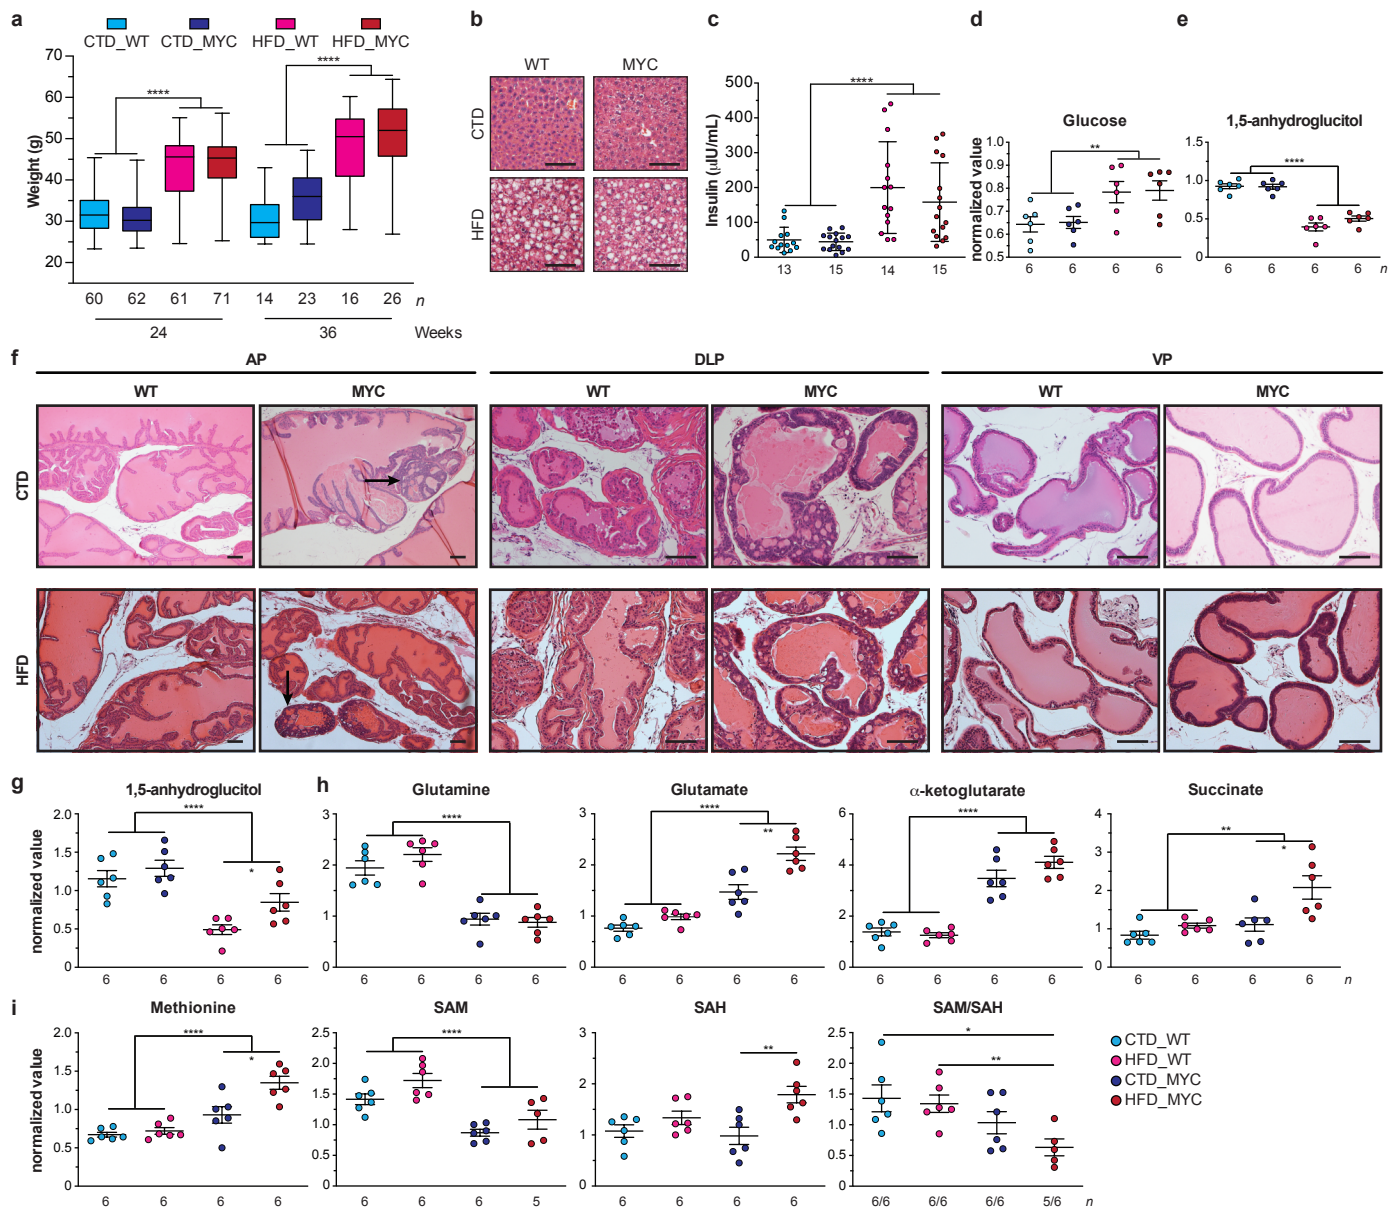

### Supplementary Figure 1: High-fat diet and MYC over expression alters the prostatic metabolome.

(a) Mice fed a high fat diet maintain an increased body weight at 24 and 36 weeks of age ( $n$  = biologically independent animals; two-way ANOVA, median, whiskers  $\pm$  min/max; \*\*\*\* $P < 0.0001$ ). (b, c, d, e) HFD results in liver steatosis (b, hematoxylin and eosin (H&E) staining; scale bar = 100  $\mu$ M), increased circulating insulin (c,  $n$  = biologically independent animals; two-way ANOVA, mean  $\pm$  s.d.; three samples were removed from the analysis - see methods; \*\*\*\* $P < 0.0001$ ) and glucose (d,  $n$  = biologically independent animals; two-way ANOVA, mean  $\pm$  s.e.m.; \*\* $P < 0.01$ ; obtained from metabolic profiling), and decreased circulating 1,5-anhydroglucitol (e,  $n$  = biologically independent animals; two-way ANOVA, mean  $\pm$  s.e.m.; \*\*\*\* $P < 0.0001$ ; obtained from metabolic profiling) in 12-week-old mice. (f) Representative H&E staining of prostate lobes from 12-week-old mice fed a CTD diet depicting representative normal (WT) and transformed (MYC; prostatic intraepithelial neoplasia (PIN) in the AP (arrow), DLP and VP; scale bar = 100  $\mu$ M) prostatic glands. (g, h, i) Quantification of metabolites related to the HFD-associated phenotype (g), demethylation (h) and methylation processes (i) in the VP of 12-weeks-old mice ( $n$  = biologically independent VP; mean  $\pm$  s.e.m.; HFD vs. CTD or MYC vs. WT two group comparisons: two-way ANOVA; single group comparisons: unpaired  $t$  test, ; \* $P < 0.05$ , \*\* $P < 0.01$ , \*\*\* $P < 0.001$ , \*\*\*\* $P < 0.0001$ ). Complete details on changes in prostatic and serum metabolites are shown in Supplementary Data 2 and 15, respectively. Source data are provided as a Source Data file.

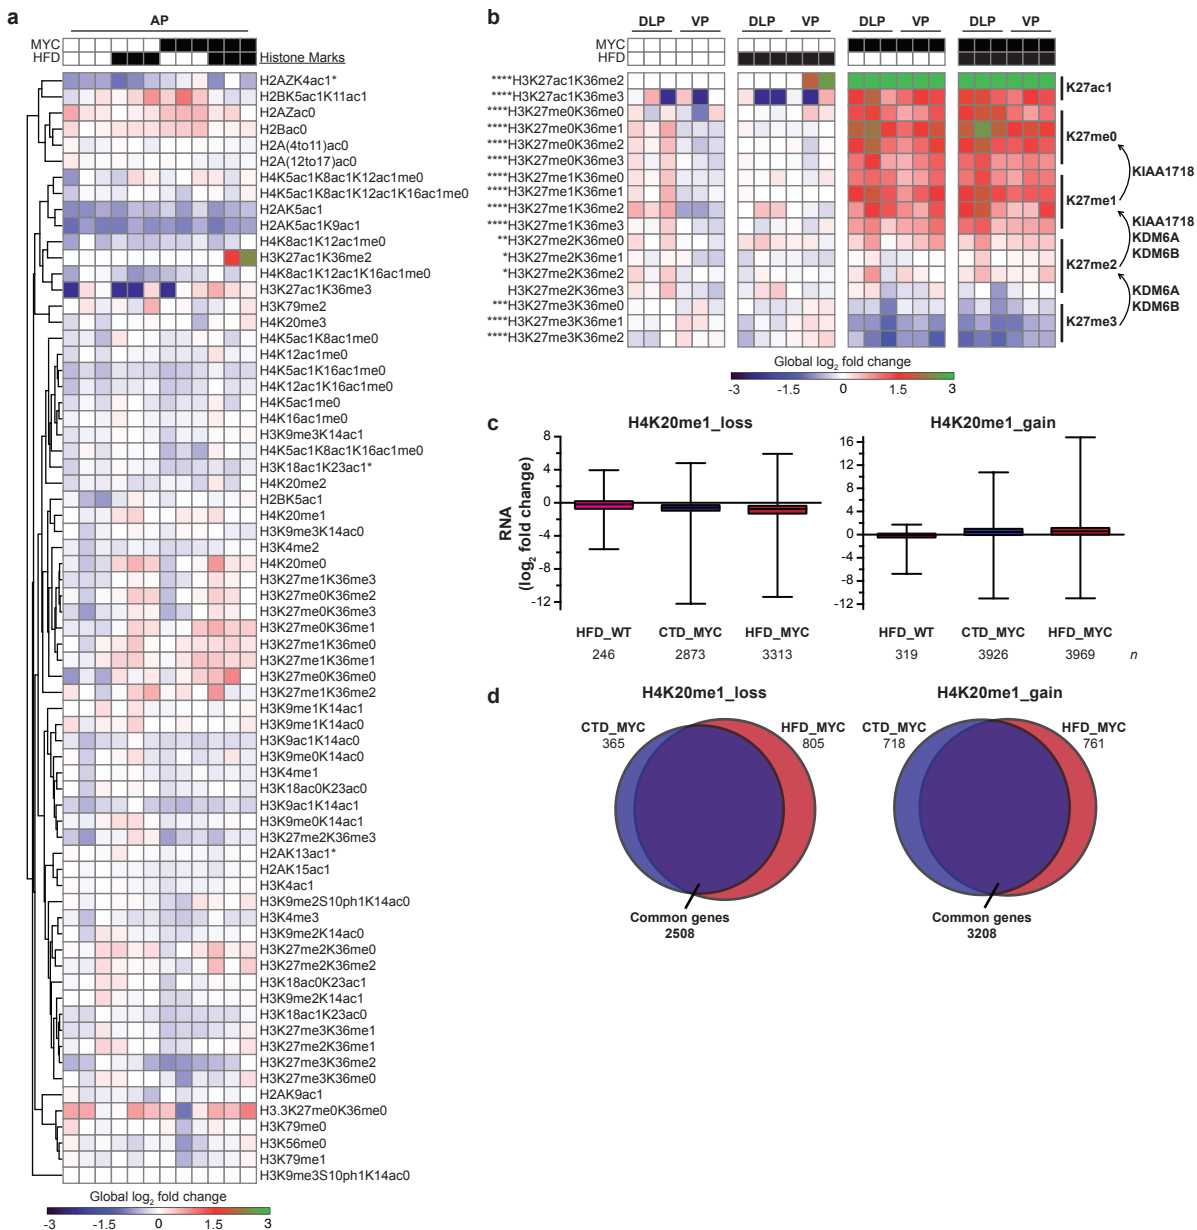

**Supplementary Figure 2: High-fat diet and MYC over expression alters the global prostatic chromatin profile and transcriptome.** (a) Global chromatin profiling of AP lobes (histone marks levels relative to the DLP, VP and AP CTD\_WT median values; MYC vs. WT comparisons, unpaired *t* test; \**P*<0.05; Supplementary Data 6). (b) MYC overexpression, irrespective of diet, results in a significant hypomethylation of the H3K27 mark (MYC vs. WT comparisons, unpaired *t* test; \**P*<0.05, \*\**P*<0.01, \*\*\*\**P*<0.0001). (c) Decrease in H4K20me1 gene body-associated mark (relative to the CTD\_WT condition) is associated with a lower level of gene transcription (*left*) while its gain to higher gene transcription (*right*) especially in the context of MYC overexpression (median, whiskers ± min/max). (d) Venn diagram showing overlapping genes between the CTD\_MYC and HFD\_MYC conditions that demonstrate either a decrease (*left*) or an increase (*right*) in H4K20me1 gene body-associated mark relative to the CTD\_WT condition.



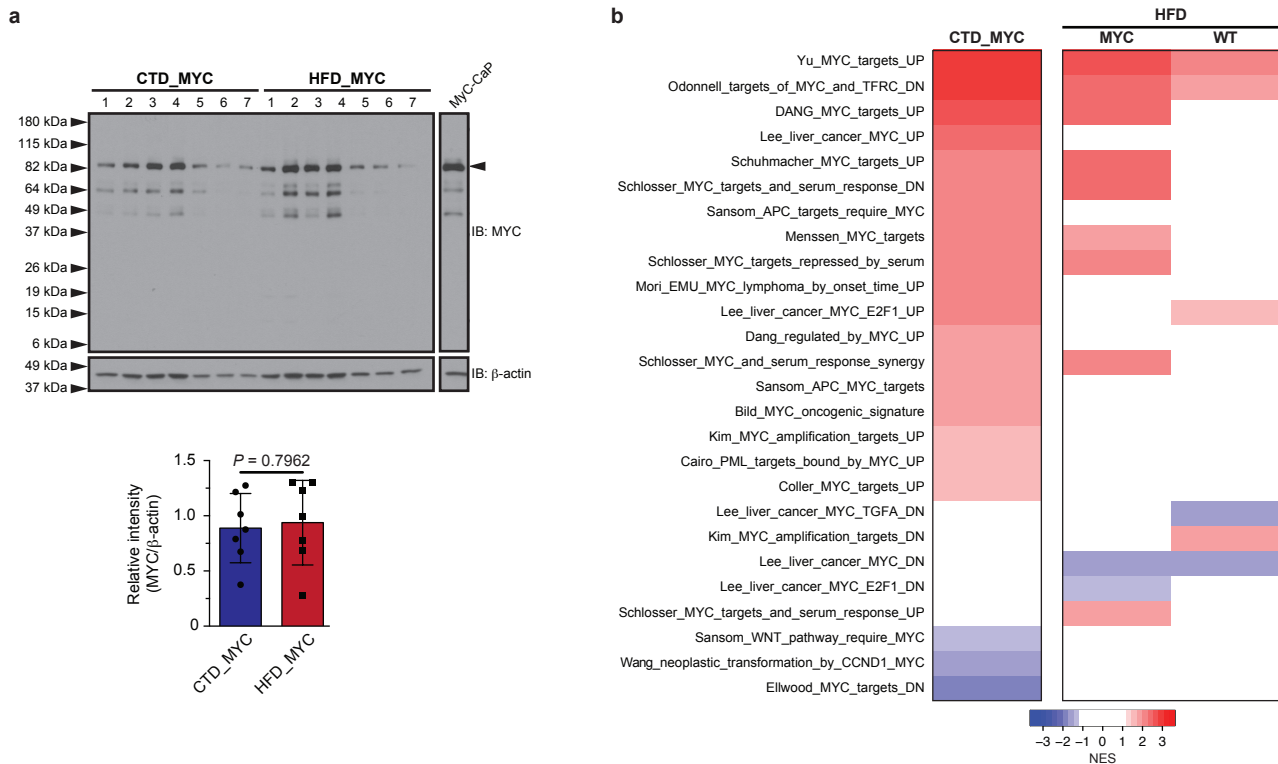

**Supplementary Figure 3: The MYC transcriptional signature is amplified by high-fat diet.** (a) MYC transgene protein level (VP,  $n = 7$  biologically independent lobes) and its quantification (unpaired  $t$  test, mean  $\pm$  s.d.). MyC-CaP cell lysates were used as positive controls for MYC transgene expression (arrow). (b) Heatmap representation of all MYC-related gene sets, enriched (red) or depleted (blue) either by MYC overexpression (left column) or HFD in a MYC or WT context (GSEA, Chemical and Genetic Perturbation). Leading edge genes included in the enriched gene sets, together with both MYC-related Hallmark gene sets ( $n = 610$  genes) were used to derive the murine prostatic MYC signature (Supplementary Data 9). Source data are provided as a Source Data file.

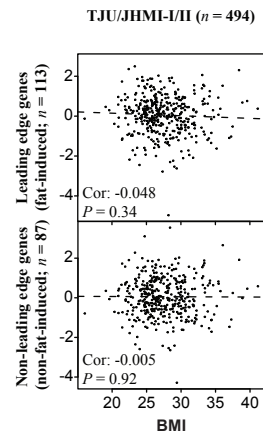

**Supplementary Figure 4: The saturated fat-induced MYC signature does not correlate with BMI as observed in the TJU/JHMI-I/II cohorts ( $n = 494$ ).**

## **Supplementary Tables**

**Supplementary Table 1:** Murine diets – Selected nutrients

**Supplementary Table 2:** MYC signature score based on randomly picked MYC\_targets\_V1 genes in relation to the risk of prostate cancer death among men diagnosed with non-metastatic prostate cancer

**Supplementary Table 3:** Univariate survival analysis – Validation cohorts

**Supplementary Table 4:** Multivariate survival analysis including gleason grade – Validation cohorts

**Supplementary Table 5:** Multivariate survival analysis including Cell Cycle Progression score – Validation cohorts

**Supplementary Table 6:** Murine diets – Formula

**Supplementary Table 7:** Metabolomics – Internal standards

**Supplementary Table 8:** Metabolomics – Elution gradient profiles

**Supplementary Table 9:** Metabolomics – MS details

**Supplementary Table 1: Murine diets – Selected nutrients**

|                    | <b>Control diet</b> |                    | <b>High fat diet</b> |                    |
|--------------------|---------------------|--------------------|----------------------|--------------------|
|                    | <b>TD.130838</b>    |                    | <b>TD.06414</b>      |                    |
| <b>Nutrient</b>    | <b>% by weigh</b>   | <b>% kcal from</b> | <b>% by weigh</b>    | <b>% kcal from</b> |
| Protein            | 16.5                | 18.4               | 23.5                 | 18.4               |
| Carbohydrate       | 63.9                | 71.1               | 27.3                 | 21.3               |
| Fat                | 4.2                 | 10.5               | 34.3                 | 60.3               |
| <i>Soybean Oil</i> | 2                   | 5                  | 3                    | 5.3                |
| <i>Lard</i>        | 2                   | 5                  | 31                   | 54.7               |
| kcal/g             | 3.6                 |                    | 5.1                  |                    |

**Supplementary Table 2:** MYC signature score based on randomly picked MYC\_targets\_V1 genes in relation to the risk of prostate cancer death among men diagnosed with non-metastatic prostate cancer

| MYC score        | N  | OR<br>(95% CI)*   | OR<br>(95% CI)‡   | OR<br>(95% CI)§   |
|------------------|----|-------------------|-------------------|-------------------|
| Tertile 1 (low)  | 17 | 1.00              | 1.00              | 1.00              |
| Tertile 2        | 19 | 1.17 (0.57, 2.44) | 1.03 (0.47, 2.30) | 0.96 (0.43, 2.16) |
| Tertile 3 (high) | 26 | 1.79 (0.90, 3.64) | 1.71 (0.81, 3.70) | 1.66 (0.78, 3.61) |
| P, linear trend† |    | 0.094             | 0.152             | 0.170             |

N = lethal events; OR = odds ratio; CI = confidence interval.

\*Logistic regression model adjusted for age and year at diagnosis (continuous).

†Estimated by modeling tertiles of MYC score as continuous variable (tertile 1=0, tertile 2=1, tertile 3=2).

‡Logistic regression model adjusted for age and year at diagnosis (continuous), and Gleason grade (continuous: <7, 3+4, 4+3, >7).

§Logistic regression model adjusted for age and year at diagnosis (continuous), Gleason grade (continuous: <7, 3+4, 4+3, >7), and BMI at diagnosis (continuous).

**Supplementary Table 3:** Univariate survival analysis – Validation cohorts

| <b>Biochemical recurrence</b>             |           |              |               |          |
|-------------------------------------------|-----------|--------------|---------------|----------|
| <b>Variable</b>                           | <b>HR</b> | <b>2.50%</b> | <b>97.50%</b> | <b>P</b> |
| SFI-induced MYC signature                 | 1.09      | 0.95         | 1.24          | 0.212    |
| log2(PSA)                                 | 1.15      | 1.03         | 1.28          | 0.016    |
| Seminal vesicle invasion                  | 2.06      | 1.60         | 2.65          | <0.001   |
| Surgical margins                          | 1.42      | 1.08         | 1.88          | 0.014    |
| Extracapsular extension                   | 1.55      | 1.21         | 1.97          | <0.001   |
| Lymph node invasion                       | 1.98      | 1.32         | 2.97          | <0.001   |
| Cell Cycle Progression score              | 1.11      | 0.97         | 1.27          | 0.139    |
| Gleason grade                             | 1.67      | 1.33         | 2.11          | <0.001   |
| <b>Metastatic progression</b>             |           |              |               |          |
| <b>Variable</b>                           | <b>HR</b> | <b>2.50%</b> | <b>97.50%</b> | <b>P</b> |
| SFI-induced MYC signature                 | 1.61      | 1.18         | 2.19          | 0.003    |
| log2(PSA)                                 | 1.15      | 0.91         | 1.46          | 0.240    |
| Seminal vesicle invasion                  | 3.43      | 2.12         | 5.53          | <0.001   |
| Surgical margins                          | 1.90      | 1.12         | 3.23          | 0.017    |
| Extracapsular extension                   | 3.15      | 1.74         | 5.70          | <0.001   |
| Lymph node invasion                       | 4.60      | 2.67         | 7.91          | <0.001   |
| Cell Cycle Progression score              | 1.64      | 1.35         | 1.99          | <0.001   |
| Gleason grade                             | 5.37      | 2.88         | 10.04         | <0.001   |
| <b>Prostate cancer specific mortality</b> |           |              |               |          |
| <b>Variable</b>                           | <b>HR</b> | <b>2.50%</b> | <b>97.50%</b> | <b>P</b> |
| SFI-induced MYC signature                 | 1.53      | 0.95         | 2.45          | 0.079    |
| log2(PSA)                                 | 1.39      | 0.99         | 1.97          | 0.058    |
| Seminal vesicle invasion                  | 4.49      | 2.16         | 9.35          | <0.001   |
| Surgical margins                          | 1.60      | 0.74         | 3.47          | 0.229    |
| Extracapsular extension                   | 2.31      | 1.03         | 5.16          | 0.041*   |
| Lymph node invasion                       | 4.83      | 2.23         | 10.48         | <0.001   |
| Cell Cycle Progression score              | 1.64      | 1.24         | 2.17          | <0.001   |
| Gleason grade                             | 4.48      | 1.82         | 11.03         | 0.001    |

\*Gleason grade groups 3, 4, 5 (ref = groups 1 and 2)

**Supplementary Table 4:** Multivariate survival analysis including gleason grade – Validation cohorts

| <b>Biochemical recurrence</b>             |           |              |               |          |
|-------------------------------------------|-----------|--------------|---------------|----------|
| <b>Variable</b>                           | <b>HR</b> | <b>2.50%</b> | <b>97.50%</b> | <b>P</b> |
| SFI-induced MYC signature                 | 1.04      | 0.91         | 1.19          | 0.555    |
| log2(PSA)                                 | 1.09      | 0.97         | 1.22          | 0.168    |
| Seminal vesicle invasion                  | 1.71      | 1.29         | 2.28          | <0.001   |
| Surgical margins                          | 1.46      | 1.09         | 1.94          | 0.010    |
| Extracapsular extension                   | 1.16      | 0.88         | 1.53          | 0.291    |
| Lymph node invasion                       | 1.73      | 1.13         | 2.63          | 0.011    |
| Gleason grade                             | 1.49      | 1.16         | 1.90          | 0.001    |
| <b>Metastatic progression</b>             |           |              |               |          |
| <b>Variable</b>                           | <b>HR</b> | <b>2.50%</b> | <b>97.50%</b> | <b>P</b> |
| SFI-induced MYC signature                 | 1.45      | 1.06         | 1.97          | 0.020    |
| log2(PSA)                                 | 1.01      | 0.8          | 1.29          | 0.905    |
| Seminal vesicle invasion                  | 1.87      | 1.11         | 3.17          | 0.020    |
| Surgical margins                          | 1.68      | 0.99         | 2.84          | 0.055    |
| Extracapsular extension                   | 1.62      | 0.84         | 3.11          | 0.149    |
| Lymph node invasion                       | 2.75      | 1.54         | 4.92          | <0.001   |
| Gleason grade                             | 3.84      | 2.01         | 7.33          | <0.001   |
| <b>Prostate cancer specific mortality</b> |           |              |               |          |
| <b>Variable</b>                           | <b>HR</b> | <b>2.50%</b> | <b>97.50%</b> | <b>P</b> |
| SFI-induced MYC signature                 | 1.32      | 0.85         | 2.05          | 0.212    |
| log2(PSA)                                 | 1.29      | 0.92         | 1.79          | 0.138    |
| Seminal vesicle invasion                  | 2.86      | 1.24         | 6.58          | 0.014    |
| Surgical margins                          | 1.45      | 0.68         | 3.09          | 0.330    |
| Extracapsular extension                   | 0.88      | 0.35         | 2.17          | 0.777    |
| Lymph node invasion                       | 2.51      | 1.07         | 5.89          | 0.034    |
| Gleason grade                             | 3.37      | 1.31         | 8.65          | 0.012    |

\*Gleason grade groups 3, 4, 5 (ref = groups 1 and 2)



**Supplementary Table 5:** Multivariate survival analysis including Cell Cycle Progression score – Validation cohorts

| <b>Biochemical recurrence</b>             |           |              |               |          |
|-------------------------------------------|-----------|--------------|---------------|----------|
| <b>Variable</b>                           | <b>HR</b> | <b>2.50%</b> | <b>97.50%</b> | <b>P</b> |
| SFI-induced MYC signature                 | 1.05      | 0.92         | 1.20          | 0.464    |
| log2(PSA)                                 | 1.08      | 0.97         | 1.21          | 0.177    |
| Seminal vesicle invasion                  | 1.88      | 1.42         | 2.49          | <0.001   |
| Surgical margins                          | 1.45      | 1.09         | 1.92          | 0.011    |
| Extracapsular extension                   | 1.18      | 0.90         | 1.55          | 0.241    |
| Lymph node invasion                       | 1.87      | 1.23         | 2.85          | 0.003    |
| Cell Cycle Progression score              | 1.12      | 0.97         | 1.30          | 0.113    |
| <b>Metastatic progression</b>             |           |              |               |          |
| <b>Variable</b>                           | <b>HR</b> | <b>2.50%</b> | <b>97.50%</b> | <b>P</b> |
| SFI-induced MYC signature                 | 1.36      | 1.03         | 1.80          | 0.032    |
| log2(PSA)                                 | 0.95      | 0.75         | 1.19          | 0.645    |
| Seminal vesicle invasion                  | 2.68      | 1.58         | 4.54          | <0.001   |
| Surgical margins                          | 1.70      | 1.01         | 2.86          | 0.046    |
| Extracapsular extension                   | 1.64      | 0.85         | 3.14          | 0.138    |
| Lymph node invasion                       | 3.31      | 1.86         | 5.89          | <0.001   |
| Cell Cycle Progression score              | 1.69      | 1.37         | 2.09          | <0.001   |
| <b>Prostate cancer specific mortality</b> |           |              |               |          |
| <b>Variable</b>                           | <b>HR</b> | <b>2.50%</b> | <b>97.50%</b> | <b>P</b> |
| SFI-induced MYC signature                 | 1.35      | 0.90         | 2.00          | 0.142    |
| log2(PSA)                                 | 1.15      | 0.83         | 1.60          | 0.393    |
| Seminal vesicle invasion                  | 3.83      | 1.68         | 8.74          | 0.001    |
| Surgical margins                          | 1.49      | 0.69         | 3.20          | 0.311    |
| Extracapsular extension                   | 0.90      | 0.37         | 2.19          | 0.823    |
| Lymph node invasion                       | 2.95      | 1.30         | 6.70          | 0.010    |
| Cell Cycle Progression score              | 1.66      | 1.25         | 2.21          | <0.001   |

**Supplementary Table 6: Murine diets – Formula**

| Ingredient                 | Control diet  |                   | High fat diet |                   |
|----------------------------|---------------|-------------------|---------------|-------------------|
|                            | TD.130838     |                   | TD.06414      |                   |
|                            | g/kg          | g/3.6<br>(Kcal/g) | g/kg          | g/5.1<br>(Kcal/g) |
| Casein                     | 186           | 51.7              | 265           | 52.0              |
| Maltodextrin               | 112.5         | 31.3              | 160           | 31.4              |
| L-Cystine                  | 2.8           | 0.8               | 4             | 0.8               |
| Sucrose                    | 63.2          | 17.6              | 90            | 17.6              |
| Cellulose                  | 46            | 12.8              | 65.5          | 12.8              |
| Soybean Oil                | 20            | 5.6               | 30            | 5.9               |
| <b>Lard</b>                | <b>20</b>     | <b>5.6</b>        | <b>310</b>    | <b>60.8</b>       |
| <b>Corn Starch</b>         | <b>496.25</b> | <b>137.8</b>      | <b>NA</b>     | <b>NA</b>         |
| Calcium Phosphate, dibasic | 2             | 0.6               | 3.4           | 0.7               |
| Choline Bitartrate         | 2.15          | 0.6               | 3             | 0.6               |
| Mineral Mix*               | 34            | 9.4               | 48            | 9.4               |
| Vitamin Mix†               | 15            | 4.2               | 21            | 4.1               |
| Red Food Color             | 0.1           | 0.0               | NA            | NA                |
| Blue Food Color            | NA            | NA                | 0.1           | 0.0               |

\*AIN-93G-MX (94046)

†AIN-93-VX (94047)

**Supplementary Table 7: Metabolomics – Internal standards**

| <b>Method</b> | <b>Internal Standard</b>                                                                                                                                                                              |
|---------------|-------------------------------------------------------------------------------------------------------------------------------------------------------------------------------------------------------|
| LC Neg        | D7-glucose, d3-methionine, d3-leucine, d8-phenylalanine, d5-tryptophan, bromophenylalanine, d15-octanoic acid, d19-decanoic acid, d27-tetradecanoic acid, d35-octadecanoic acid, d2-eicosanoic acid   |
| LC HILIC      | D35-octadecanoic acid, d5-indole acetic acid, bromophenylalanine, d5-tryptophan, d4-tyrosine, d3-serine, d3-aspartic acid, d7-ornithine, d4-lysine                                                    |
| LC Pos        | D7-glucose, d3-methionine, d3-leucine, d8-phenylalanine, d5-tryptophan, bromophenylalanine, d4-tyrosine, d5-indole acetic acid, d5-hippuric acid, amitriptyline, d9-progesterone, d4-dioctylphthalate |

LC = Liquid Chromatography

HILIC = Hydrophilic Interaction Liquid Chromatography

**Supplementary Table 8: Metabolomics – Elution gradient profiles**

| <b>Reverse Phase Pos and Neg Gradient Profile</b> |                      |                      |                       |
|---------------------------------------------------|----------------------|----------------------|-----------------------|
| <b>Time (min)</b>                                 | <b>Solvent A (%)</b> | <b>Solvent B (%)</b> | <b>Flow Rate (mL)</b> |
| 0                                                 | 99.5                 | 0.5                  | 0.35                  |
| 4                                                 | 30                   | 70                   | 0.35                  |
| 4.5                                               | 2                    | 98                   | 0.35                  |
| 5.4                                               | 2                    | 98                   | 0.35                  |
| 5.6                                               | 99.5                 | 0.5                  | 0.35                  |
| 11                                                | 99.5                 | 0.5                  | 0.35                  |

| <b>HILIC Neg Gradient Profile</b> |                      |                      |                       |
|-----------------------------------|----------------------|----------------------|-----------------------|
| <b>Time (min)</b>                 | <b>Solvent A (%)</b> | <b>Solvent B (%)</b> | <b>Flow Rate (mL)</b> |
| 0                                 | 95                   | 5                    | 0.5                   |
| 3.5                               | 50                   | 50                   | 0.5                   |
| 5.5                               | 5                    | 95                   | 0.5                   |
| 6.5                               | 5                    | 95                   | 0.5                   |
| 6.7                               | 95                   | 5                    | 0.5                   |
| 11                                | 95                   | 5                    | 0.5                   |

**Supplementary Table 9:** Metabolomics – MS details

| <b>Instrument</b>                          | <b>Q-Exactive</b> |         |           |
|--------------------------------------------|-------------------|---------|-----------|
| Method                                     | RP Pos            | RP Neg  | HILIC Neg |
| Source Type                                | HESI-II           | HESI-II | HESI-II   |
| Sheath Gas (au)                            | 80                | 75      | 60        |
| Auxiliary Gas (au)                         | 12                | 15      | 20        |
| Spray Voltage (kV)                         | 4                 | 2,75    | 3         |
| Source Heater Temp. (°C)                   | 400               | 400     | 380       |
| Ion Transfer Tube Temp. (°C)               | 300               | 300     | 400       |
| Normalized Collision Energy (au)           | 45                | 60      | 60        |
| Stepped Normalized Collision Energy (%)    | 20                | 20      | 20        |
| Mass Range (m/z)                           | 80-1000           |         |           |
| MS AGC target (au)                         | 1,00E+06          |         |           |
| MS Max Fill Time (ms)                      | 60                |         |           |
| MS <sup>n</sup> Ion Target (au)            | 2,00E+05          |         |           |
| MS <sup>n</sup> Max Time (ms)              | 120               |         |           |
| MS <sup>n</sup> Isolation Window (m/z)     | 3                 |         |           |
| MS <sup>n</sup> Dynamic Exclusion Time (s) | 3                 |         |           |
